# Supplementary material for: Use of a Silkworm (Bombyx mori) Larvae By-Product for the Treatment of Atopic Dermatitis: Inhibition of NF-κB Nuclear Translocation and MAPK Signaling
Source: MDPI journal article supplement (doi:10.3390/nu15071775), 2023-04-05
Supplement: s1 [file s1]

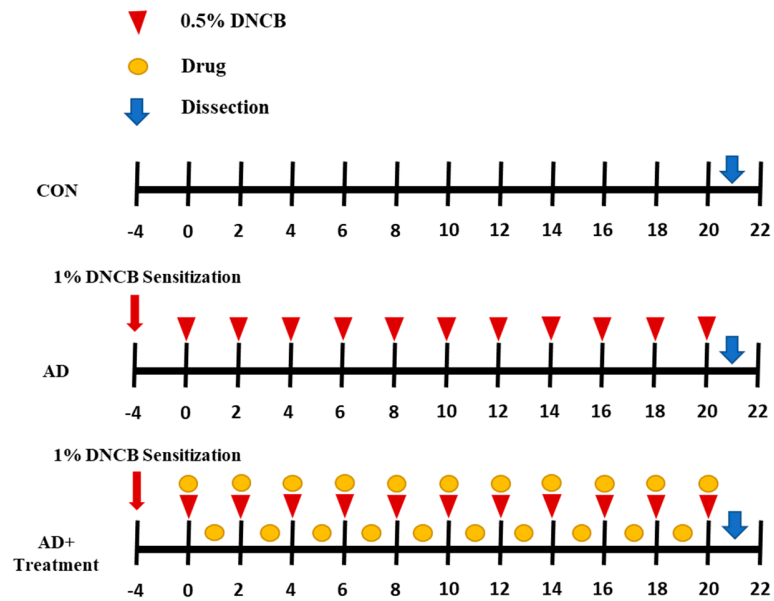

**Supplementary Figure S1** Experimental design for DNFB-induced BALB/c mice. Four days before topical application of SLPY, 1% DNFB applied to evoke AD-like skin lesions. After 4 days of 1% DNFB sensitization, mice were challenged with 0.5% DNFB for two days interval for 3 weeks. Two concentration levels (50, 100 mg/kg) of SLPY and dermatop (0.25% (w/w) topically applied daily to treat AD-like skin lesion and compare against the control and AD groups.

**Supplementary Table S1** Primer sequence of the respective gene used in qRT-PCR analysis

| Gene          | Primer  | Sequence                   |
|---------------|---------|----------------------------|
| GAPDH         | Forward | GCA CAG TCA AGG CCG AGA AT |
|               | Reverse | GCC TTC TCC ATG GTG GTG AA |
| TNF- $\alpha$ | Forward | AAG CCT GTA GCC CAC GTC GT |
|               | Reverse | GGC ACC ACT AGT TGG TTG TC |
| IL-4          | Forward | ACA GGA GAA GGG ACG CCA T  |
|               | Reverse | GAA GCC GTA CAG ACG AGC TC |
| IL-6          | Forward | CCG GAG AGG AGA CTT CAC AG |
|               | Reverse | GGA AAT TGG GGT AGG AAG GA |
| IL-10         | Forward | TCA GCT GTG TCT GGG CCA CT |
|               | Reverse | TTA TGA GTA GGG ACA GGA AG |
| IL-13         | Forward | GCA ACA TCA ACA GGA CCA GA |
|               | Reverse | GTC AGG GAA TCC AGG GCT AC |
| IL-17         | Forward | TCC CCT CTG TCA TCT GGG AA |
|               | Reverse | CTC GAC CCT GAA AGT GAA GG |
